# Supplementary material for: Multimodal Coherent Imaging of Retinal Biomarkers of Alzheimer’s Disease in a Mouse Model
Source: PubMed Central journal article supplement (PMC7220911; doi:10.1038/s41598-020-64827-2), 2020-05-13

# Multimodal Coherent Imaging of Retinal Biomarkers of Alzheimer's Disease in a Mouse Model

Ge Song<sup>1\*</sup>, Zachary A. Steelman<sup>1</sup>, Stella Finkelstein<sup>2</sup>, Ziyun Yang<sup>1</sup>, Ludovic Martin<sup>2</sup>,  
Kengyeh K. Chu<sup>1</sup>, Sina Farsiu<sup>1,2</sup>, Vadim Y. Arshavsky<sup>2</sup>, Adam Wax<sup>1</sup>

<sup>1</sup>Department of Biomedical Engineering, Duke University, Durham, NC 27708, USA

<sup>2</sup>Department of Ophthalmology, Duke Eye Center, Durham, NC 27710, USA

\*gs172@duke.edu

## Supplementary Information

**Supplementary Figure S1.** Morphometric analysis of the retinas from (a) 14 months old APP/PS1 and (b) WT mice of matched genetic backgrounds. Images are obtained from 0.5  $\mu\text{m}$ -thick plastic-embedded retinal cross-sections; scale bar: 200  $\mu\text{m}$ .

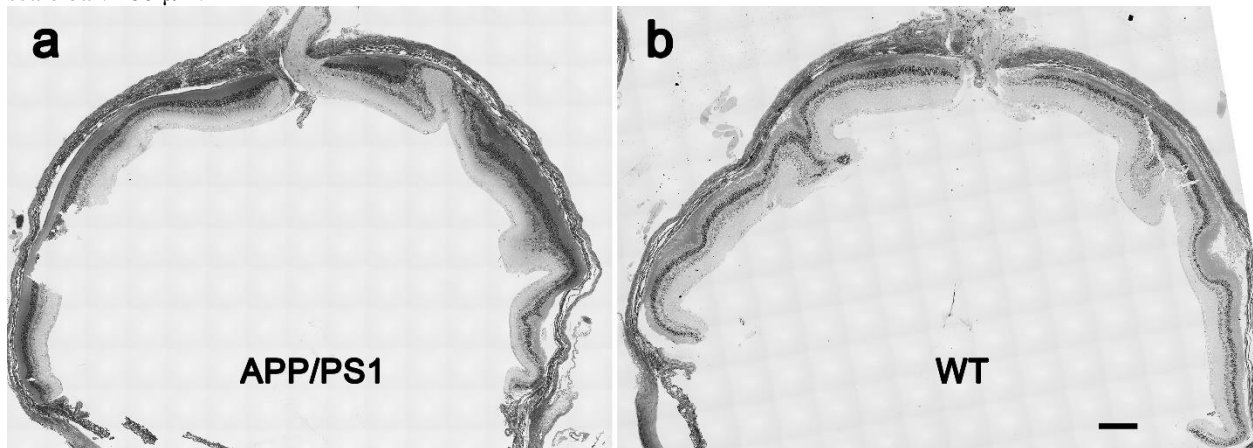

Supplement: 41598_2020_64827_MOESM1_ESM.pdf [file 41598_2020_64827_MOESM1_ESM.pdf]
